# Supplementary material
Source: publisher figshare collection journal article supplement (https://acs.figshare.com/ndownloader/files/22179372)

## **Supporting Information**

### **Triazole-Modified Calix[4]crown as a Novel Fluorescent On-Off Switchable Chemosensor**

Kai-Chi Chang, In-Hao Su, Annamalai Senthilvelan and Wen-Sheng Chung\*

*Department of Applied Chemistry, National Chiao-Tung University, Hsinchu, 30050,*

*Taiwan-ROC*

#### **Table of contents**

| <b><u>Page No</u></b> | <b><u>Content</u></b>                                                                                                                                                                                                                                                                                                                                                                                                                                                |
|-----------------------|----------------------------------------------------------------------------------------------------------------------------------------------------------------------------------------------------------------------------------------------------------------------------------------------------------------------------------------------------------------------------------------------------------------------------------------------------------------------|
| S3.                   | General information and synthesis and spectroscopic data for <b>4</b> .                                                                                                                                                                                                                                                                                                                                                                                              |
| S4.                   | Synthesis and spectroscopic data for <b>2</b> .                                                                                                                                                                                                                                                                                                                                                                                                                      |
| S5.                   | Synthesis and spectroscopic data for <b>3</b> .                                                                                                                                                                                                                                                                                                                                                                                                                      |
| S6.                   | Synthesis and spectroscopic data for <b>1</b> .                                                                                                                                                                                                                                                                                                                                                                                                                      |
| S7.                   | $^1\text{H}$ & $^{13}\text{C}$ NMR Spectrum of <b>4</b> .                                                                                                                                                                                                                                                                                                                                                                                                            |
| S8.                   | $^1\text{H}$ & $^{13}\text{C}$ NMR Spectrum of <b>2</b> .                                                                                                                                                                                                                                                                                                                                                                                                            |
| S9.                   | $^1\text{H}$ & $^{13}\text{C}$ NMR Spectrum of <b>3</b> .                                                                                                                                                                                                                                                                                                                                                                                                            |
| S10.                  | $^1\text{H}$ & $^{13}\text{C}$ NMR Spectrum of <b>1</b> .                                                                                                                                                                                                                                                                                                                                                                                                            |
| S11.                  | Fluorescence emission spectra of <b>1</b> (solid line) and <b>2</b> (dash line) (10 $\mu\text{M}$ ) in $\text{MeCN}/\text{CHCl}_3$ ( $v/v = 1000:4$ ) (Figure S9) & $^1\text{H}$ NMR spectra of <b>2</b> (2.5 mM) in $\text{CDCl}_3/\text{CD}_3\text{CN}$ (3:1) solution in the presence of various metal perchlorates (1.0 equiv): (a) <b>2</b> , (b) <b>2</b> + $\text{Hg}^{2+}$ , (c) <b>2</b> + $\text{Cr}^{3+}$ , (d) <b>2</b> + $\text{Cu}^{2+}$ (Figure S10). |
| S12.                  | Changes in fluorescence emission spectra of <b>1</b> (10 $\mu\text{M}$ ) upon titration with $\text{Cu}(\text{ClO}_4)_2$ in $\text{MeCN}/\text{CHCl}_3$ ( $v/v = 1000:4$ ) (Figure S11) & Job plot of a 1:1 complex of <b>1</b> and $\text{Cu}^{2+}$ . (Figure S12)                                                                                                                                                                                                  |
| S13.                  | Changes in fluorescence emission spectra of <b>1</b> (10 $\mu\text{M}$ ) upon titration with $\text{Hg}(\text{ClO}_4)_2$ in $\text{MeCN}/\text{CHCl}_3$ ( $v/v = 1000:4$ ) (Figure S13) & Job plot of a 1:1 complex of <b>1</b> and $\text{Hg}^{2+}$ . (Figure S14)                                                                                                                                                                                                  |

- S14. Changes in fluorescence emission spectra of **1** (10  $\mu$ M) upon titration with  $\text{Cr}(\text{ClO}_4)_3$  in  $\text{MeCN}/\text{CHCl}_3$  ( $v/v = 1000:4$ ) (Figure S15) & Job plot of a 1:1 complex of **1** and  $\text{Cr}^{3+}$ . (Figure S16)
- S15. Changes in fluorescence emission spectra of **2** (10  $\mu$ M) upon titration with  $\text{Cu}(\text{ClO}_4)_2$  in  $\text{MeCN}$ . (Figure S17) & Job plot of a 1:1 complex of **2** and  $\text{Cu}^{2+}$ . (Figure S18)
- S16. Changes in fluorescence emission spectra of **2** (10  $\mu$ M) upon titration with  $\text{Hg}(\text{ClO}_4)_2$  in  $\text{MeCN}$ . (Figure S19) & Job plot of a 1:1 complex of **2** and  $\text{Hg}^{2+}$ . (Figure S20)
- S17. Changes in fluorescence emission spectra of **2** (10  $\mu$ M) upon titration with  $\text{Cr}(\text{ClO}_4)_3$  in  $\text{MeCN}$ . (Figure S21) & Job plot of a 1:1 complex of **2** and  $\text{Cr}^{3+}$ . (Figure S22)
- S18. Fluorescence emission changes of **1**• $\text{Hg}^{2+}$ , **1**• $\text{Cu}^{2+}$  and **1**• $\text{Cr}^{3+}$  complexes in  $\text{MeCN}/\text{CHCl}_3$  ( $v/v = 1000:4$ ) upon addition of  $\text{K}^+$  (Figure S23). & Fluorescence emission changes of **1**• $\text{Pb}^{2+}$  complex in  $\text{MeCN}/\text{CHCl}_3$  ( $v/v = 1000:4$ ) upon addition of  $\text{Ba}^{2+}$  (Figure S24).
- S19. Fluorescence emission changes of **1**• $\text{Pb}^{2+}$  complex in  $\text{MeCN}/\text{CHCl}_3$  ( $v/v = 1000:4$ ) upon addition of  $\text{Zn}^{2+}$  (Figure S25). & Fluorescence emission changes for the **1** (10  $\mu$ M) with 10 equiv of  $\text{Pb}(\text{ClO}_4)_2$  in  $\text{MeCN}/\text{CHCl}_3$  ( $v/v = 1000:4$ ) upon addition of various amount of  $\text{K}^+$  ion (Figure S26).
- S20. Fluorescence emission changes for the **1** (10  $\mu$ M) with 10 equiv of  $\text{K}(\text{ClO}_4)$  in  $\text{MeCN}/\text{CHCl}_3$  ( $v/v = 1000:4$ ) upon addition of various amount of  $\text{Pb}^{2+}$  ion (Figure S27).

**General Information.** All melting points are uncorrected.  $^1\text{H}$  and  $^{13}\text{C}$  NMR spectra were recorded on 300 MHz and 500 MHz instruments. Data are reported as follows: chemical shifts in ppm ( $\delta$ ), multiplicity (s = singlet, d = doublet, bs = broad singlet, m = multiplet), coupling constant (Hz), integration, and interpretation. Mass spectra were obtained on a Micromass-Trio 2000 GCMS instrument. High resolution mass spectra were recorded on JMS-700 High performance mass spectrometer. Column chromatography was performed with  $\text{SiO}_2$  (Merck Silica Gel 60 (230-400 mesh)). UV-vis spectra were recorded by using HP-8453 spectrophotometer with a diode array detector, and the resolution was set at 1 nm. Fluorescence spectra were recorded on an Aminco Bowman Series-2 Luminescence spectrophotometer.

**Synthesis of 9-(azidomethyl)-anthracene **4**:**

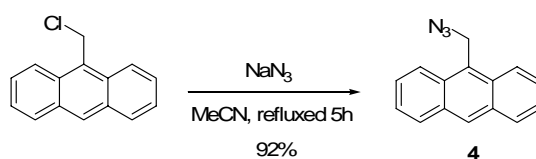

A mixture of 9-(chloromethyl)anthracene (1.00 g, 4.41 mmol) and sodium azide (0.43 g, 6.62 mmol) in 30 mL of MeCN was refluxed for 5 h. After completion of the reaction, the solvent was removed under reduced pressure and the resulting solid was recrystallized from  $\text{CH}_2\text{Cl}_2$ /methanol mixture to give **4**. Yield= 0.95g, (92%); yellow solid.; mp 80-82  $^\circ\text{C}$ ;  $R_f$  = 0.7 (hexane/EtOAc = 3/1);  $^1\text{H}$  NMR ( $\text{CDCl}_3$ , 300 MHz)  $\delta$  8.52 (s, 1H), 8.30 (d,  $J$  = 8.8 Hz, 2H), 8.06 (d,  $J$  = 8.3 Hz, 2H), 7.70-7.43 (m, 4H), 5.35 (s, 2H) ;  $^{13}\text{C}$  NMR ( $\text{CDCl}_3$ , 75.4 MHz)  $\delta$  131.3 (Cq), 130.6 (Cq), 129.2 (CH), 128.9 (CH), 126.8 (CH), 125.7 (CH), 125.1 (CH), 123.4 (CH), 46.2 ( $\text{CH}_2$ ); FABMS  $m/z$  233 ( $\text{M}^+$ , 46), 234 ( $\text{M}^+ + 1$ , 13), 204 (35), 191 (100); HR FABMS Calcd for  $\text{C}_{15}\text{H}_{11}\text{N}_3$  233.0953; Found 233.0947.

**Synthesis of 4-((2,6-dimethylphenoxy)methyl)-1-[(anthracen-10-yl)methyl]-1*H*-1,2,3-triazole****2:**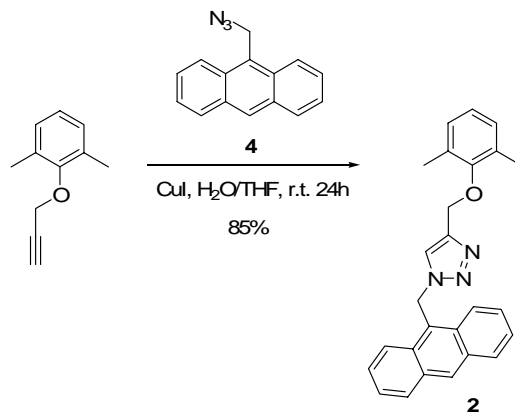

A heterogeneous mixture of 1,3-dimethyl-2-(prop-2-yn-1-yloxy)benzene (0.35 g, 2.19 mmol), 9-(azidomethyl)anthracene (0.77 g, 3.29 mmol) and CuI (about 5 mg) in THF and water (v/v = 2:1, 30.0 mL) was stirred vigorously at room temperature for 24h. The mixture was extracted thrice with chloroform. The chloroform layer was dried over MgSO<sub>4</sub> and the solvent was removed under reduced pressure. The residue obtained was purified over silica gel column eluting with hexane/ethyl acetate (v/v = 8/1) to give **2**. Yield= 0.73g (85%); light-yellow solid; mp 192-194 °C; *R<sub>f</sub>* = 0.23 (hexane/EtOAc = 5/1); <sup>1</sup>H NMR (CDCl<sub>3</sub>, 300 MHz) δ 8.60 (s, 1H), 8.33 (d, *J* = 8.5 Hz, 2H), 8.10 (d, *J* = 8.5 Hz, 2H), 7.68-7.45 (m, 4H), 7.15 (s, 1H), 6.93-6.75 (m, 3H), 6.57 (s, 2H), 4.80 (s, 2H), 2.10 (s, 6H); <sup>13</sup>C NMR (CDCl<sub>3</sub>, 75.4 MHz) δ 155.1 (Cq), 131.4 (Cq), 130.9 (Cq), 130.8 (Cq), 129.9 (CH), 129.5 (CH), 128.7 (CH), 127.7 (CH), 125.4 (CH), 124.1 (CH), 123.6 (Cq), 123.0 (CH), 122.1 (CH), 65.4 (CH<sub>2</sub>), 46.5 (CH<sub>2</sub>), 16.2 (CH<sub>3</sub>); EIMS *m/z* 393 (*M*<sup>+</sup>, 4), 244 (19), 191 (35), 57 (100); HR EIMS Calcd for C<sub>26</sub>H<sub>23</sub>N<sub>3</sub>O 393.1841; Found 393.1828.

**Synthesis of 25, 27-bis-(*O*-propargyloxy)calix[4]crown in the 1, 3-alternate conformation **3**:**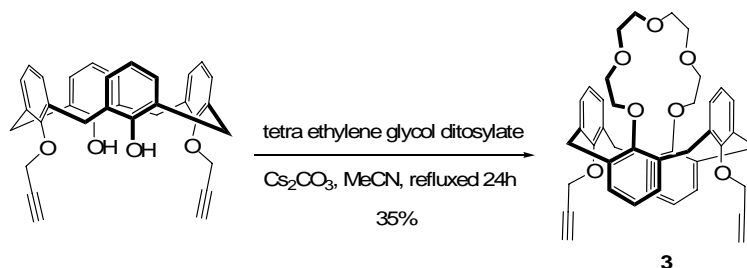

**Synthesis of 25, 27-bis-[1-((anthracen-10-yl)methyl)]-1*H*-1,2,3-triazole calix[4]crown in the 1, 3-alternate conformation **1**:**

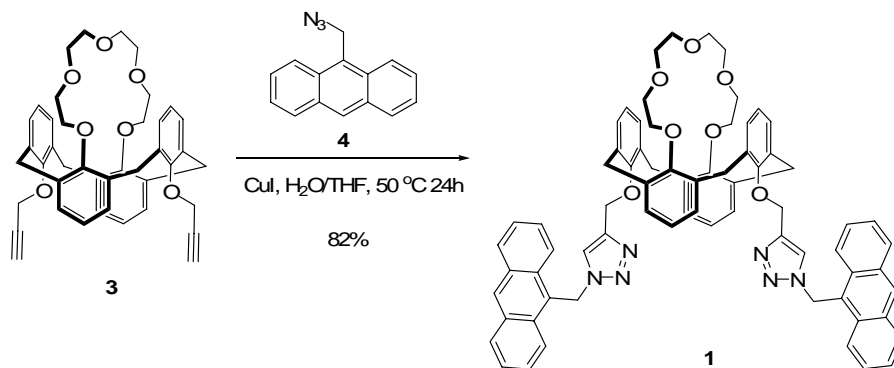

A mixture of **3** (0.20 g, 0.30mmol), 9-(azidomethyl)anthracene (0.28 g, 1.20 mmol) and CuI (about 5 mg) in THF and water (v/v = 2:1, 30.0 mL) was stirred vigorously at 50 °C for 24h. The mixture was extracted thrice with chloroform. The chloroform layer was dried over MgSO<sub>4</sub> and the solvent was removed under reduced pressure. The residue obtained was purified over silica gel column eluting with hexane/ethyl acetate (v/v = 1/1) gave **1**. Yield= 0.28g (82%); light-yellow solid; mp 245-247 °C;  $R_f$  = 0.5 (MeOH/CHCl<sub>3</sub> = 1/3); <sup>1</sup>H NMR (CDCl<sub>3</sub>, 300 MHz) δ 8.53 (s, 2H), 8.29 (d,  $J$  = 8.6 Hz, 4H), 8.01 (d,  $J$  = 8.6 Hz, 4H), 7.69-7.58 (m, 4H), 7.52-7.47 (m, 4H), 6.71 (d,  $J$  = 7.4 Hz, 4H), 6.56 (t,  $J$  = 7.4 Hz, 2H), 6.42 (s, 4H), 6.40 (d,  $J$  = 7.8 Hz, 4H), 6.24 (s, 2H), 5.67 (t,  $J$  = 7.8 Hz, 2H), 4.25 (s, 4H), 3.50-3.38 (m, 8H), 3.40 (d,  $J$  = 15.6 Hz, 4H), 3.25 (d,  $J$  = 15.6 Hz, 4H), 3.18-3.09 (m, 4H), 3.07-3.02 (m, 4H); <sup>13</sup>C NMR (CDCl<sub>3</sub>, 75.4 MHz) δ 155.3 (Cq), 155.1 (Cq), 144.1 (Cq), 134.5 (Cq), 133.6 (Cq), 131.3 (Cq), 130.7 (Cq), 129.7 (CH), 129.6 (CH), 129.4 (CH), 129.2 (CH), 127.4 (CH), 125.3 (CH), 123.9 (Cq), 123.1 (CH), 122.6 (CH), 122.5 (CH), 121.5 (CH), 71.9 (CH<sub>2</sub>), 70.1 (CH<sub>2</sub>), 70.1 (CH<sub>2</sub>), 69.1 (CH<sub>2</sub>), 63.3 (CH<sub>2</sub>), 46.2 (CH<sub>2</sub>), 37.4 (CH<sub>2</sub>); FABMS  $m/z$  1127 ( $M^+ + 2$ , 1), 647 (3); HR FABMS Calcd for C<sub>72</sub>H<sub>64</sub>N<sub>6</sub>O<sub>7</sub> 1124.4836; Found 1124.4862.

**Figure S1.**  $^1\text{H}$  NMR Spectrum of **4**.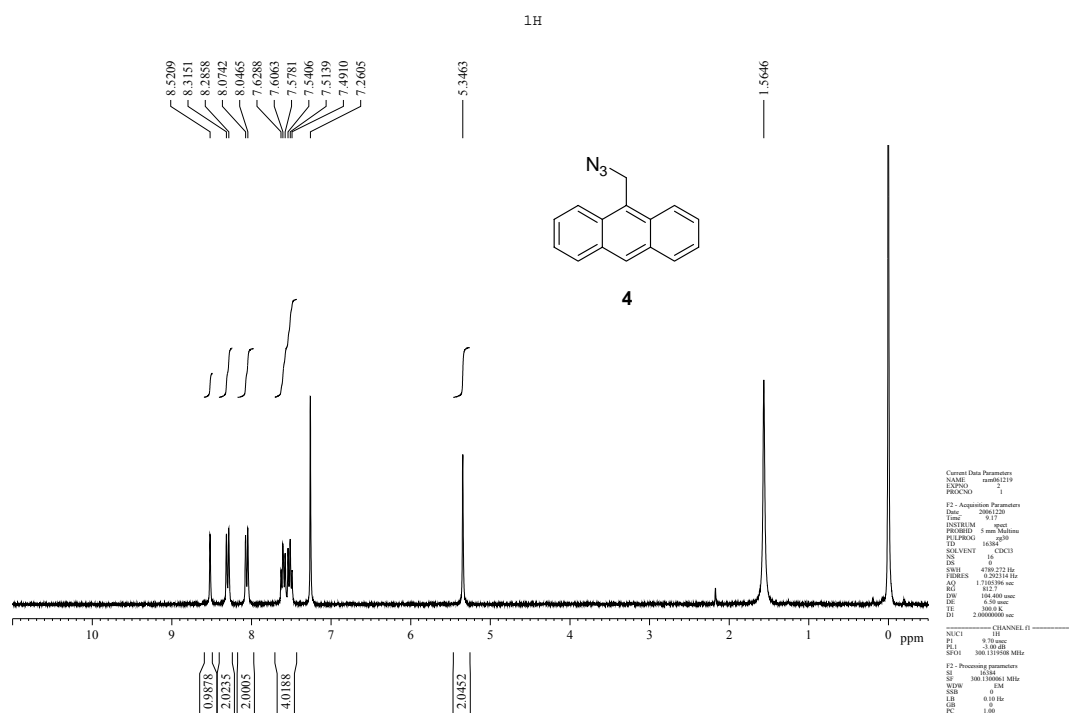**Figure S2.**  $^{13}\text{C}$  NMR Spectrum of **4**.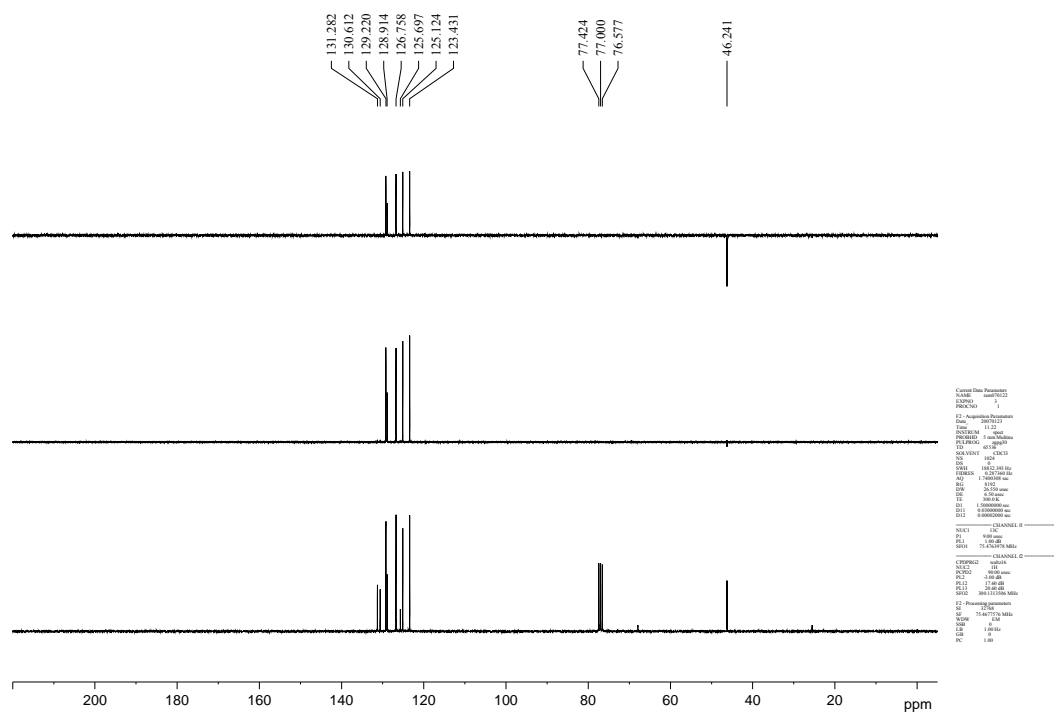

**Figure S3.**  $^1\text{H}$  NMR Spectrum of **2**.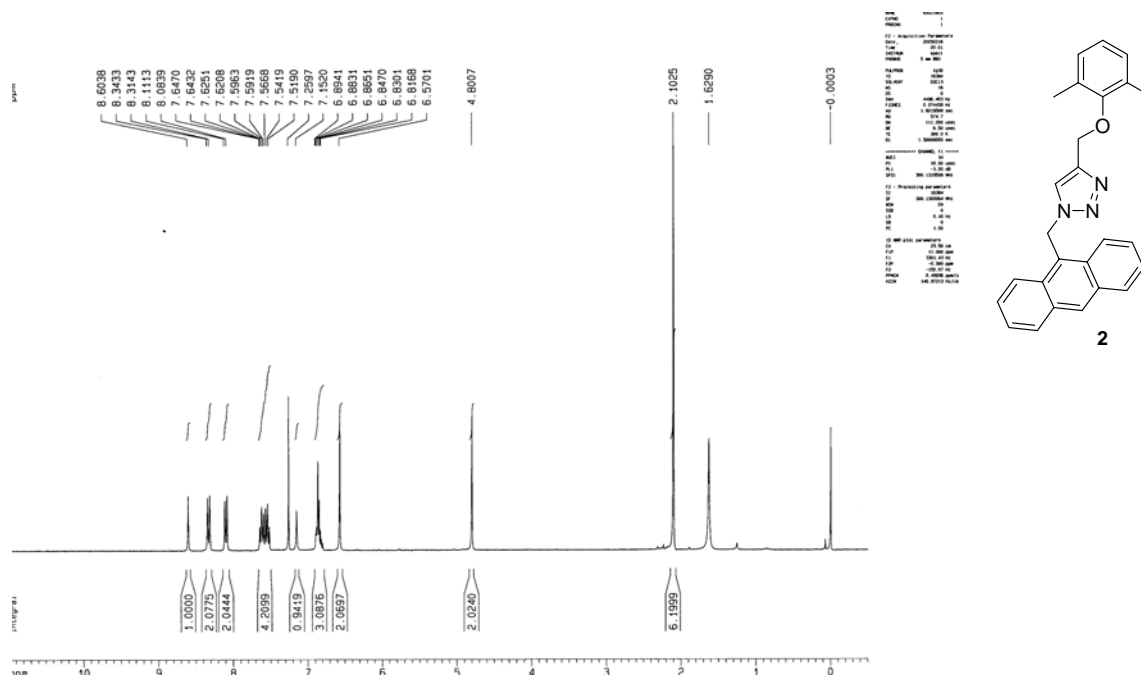**Figure S4.**  $^1\text{H}$  NMR Spectrum of **2**.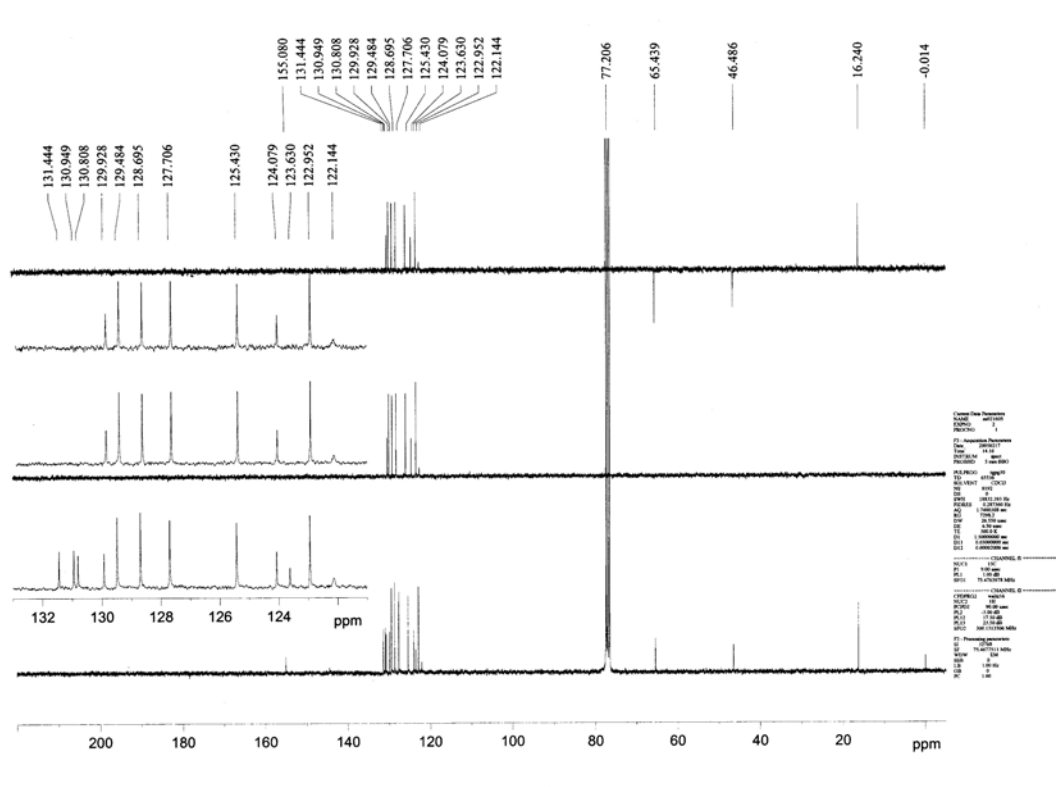



**Figure S5.**  $^1\text{H}$  NMR Spectrum of **3**.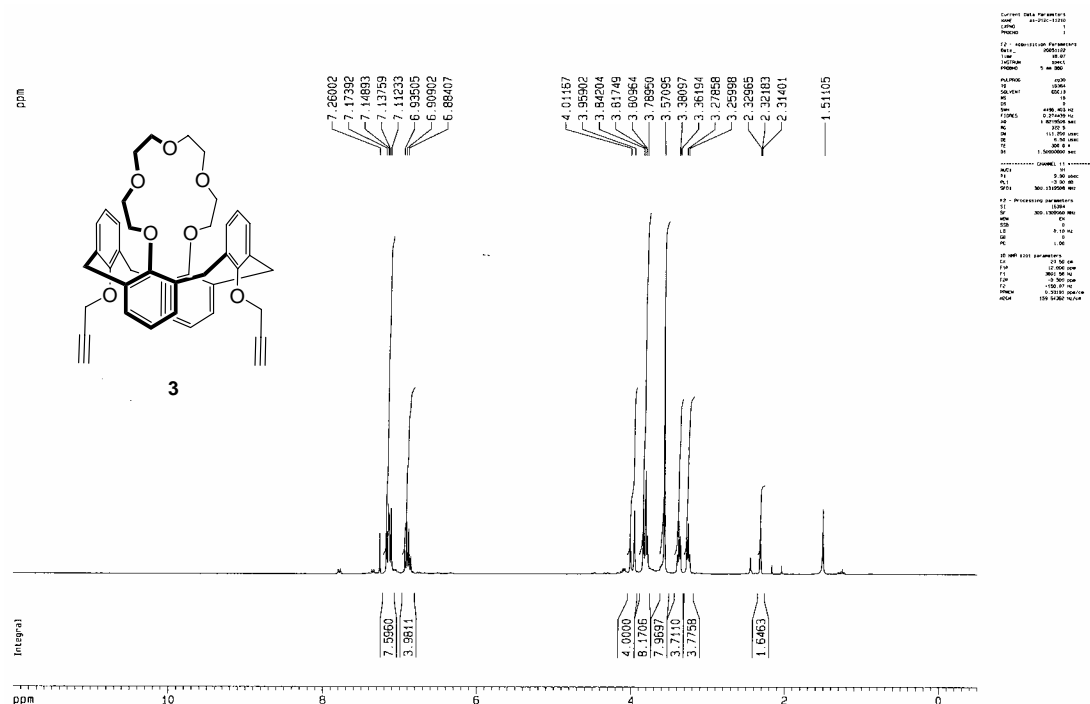**Figure S6.**  $^{13}\text{C}$  NMR Spectrum of **3**.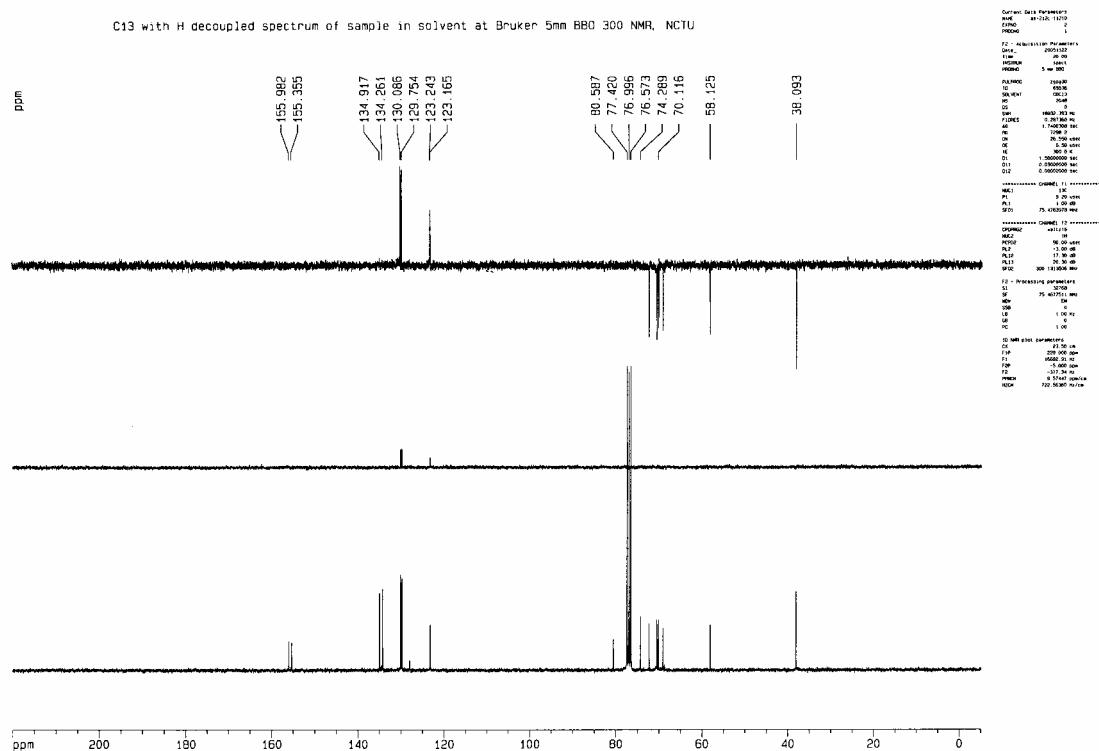

**Figure S7.**  $^1\text{H}$  NMR Spectrum of **1**.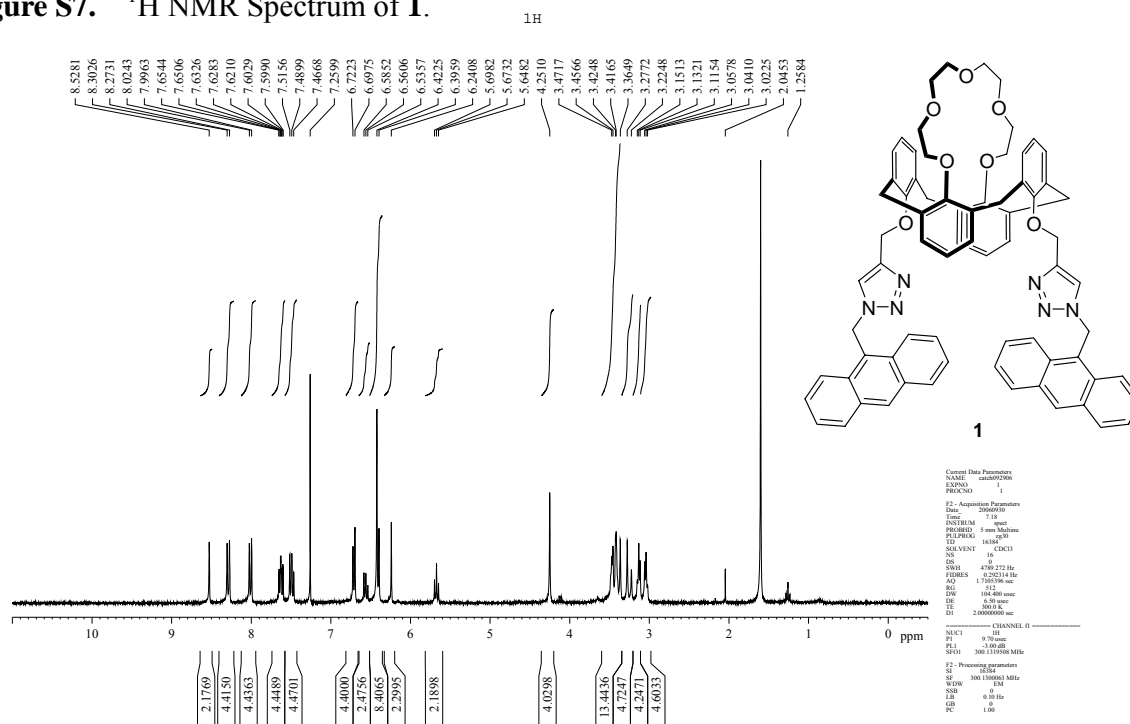**Figure S8.**  $^{13}\text{C}$  NMR Spectrum of **1**.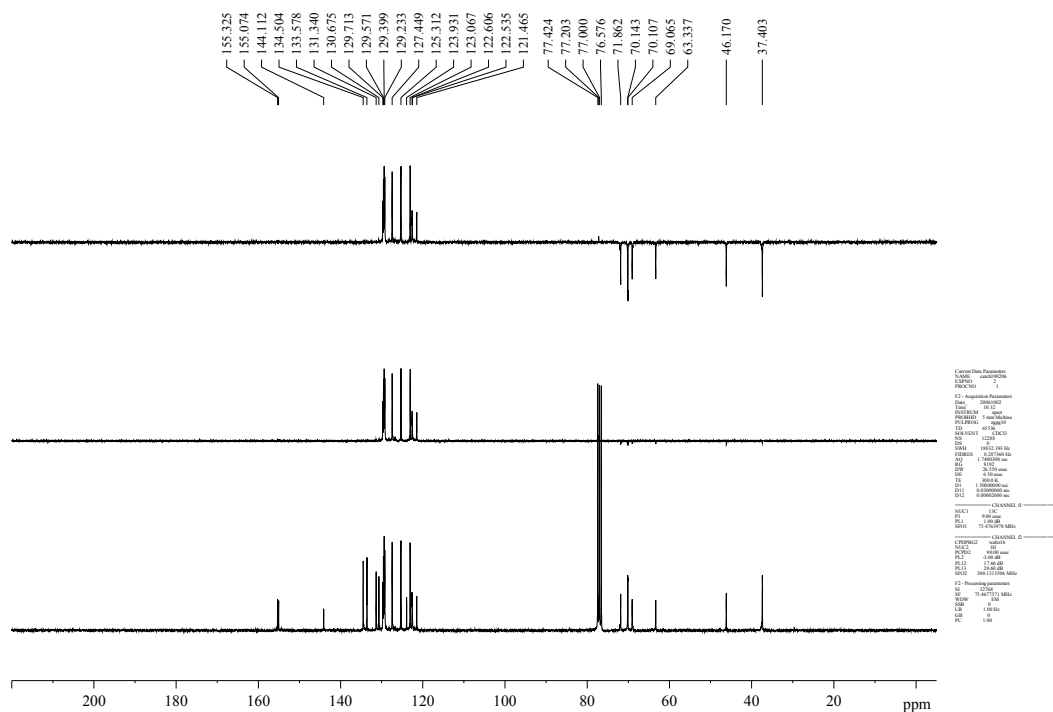

**Figure S9.** Fluorescence emission spectra of **1** (solid line) and **2** (dash line) (10  $\mu$ M) in MeCN/CHCl<sub>3</sub> (v/v = 1000:4).

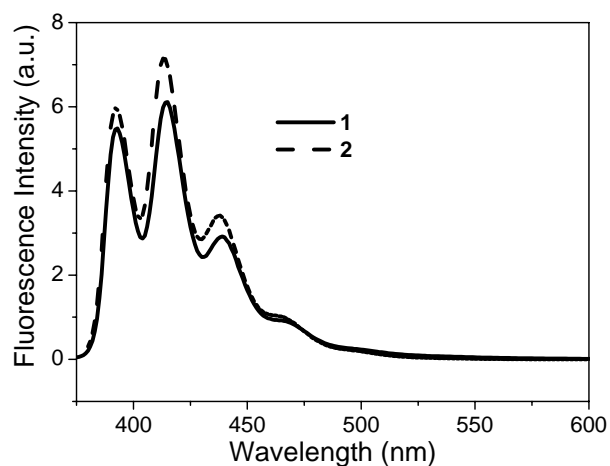

**Figure S10.** <sup>1</sup>H NMR spectra of **2** (2.5 mM) in CDCl<sub>3</sub>/CD<sub>3</sub>CN (3:1) solution in the presence of various metal perchlorates (1.0 equiv): (a) **2**, (b) **2** + Hg<sup>2+</sup>, (c) **2** + Cr<sup>3+</sup>, (d) **2** + Cu<sup>2+</sup>, where \* denotes NMR solvent peaks.

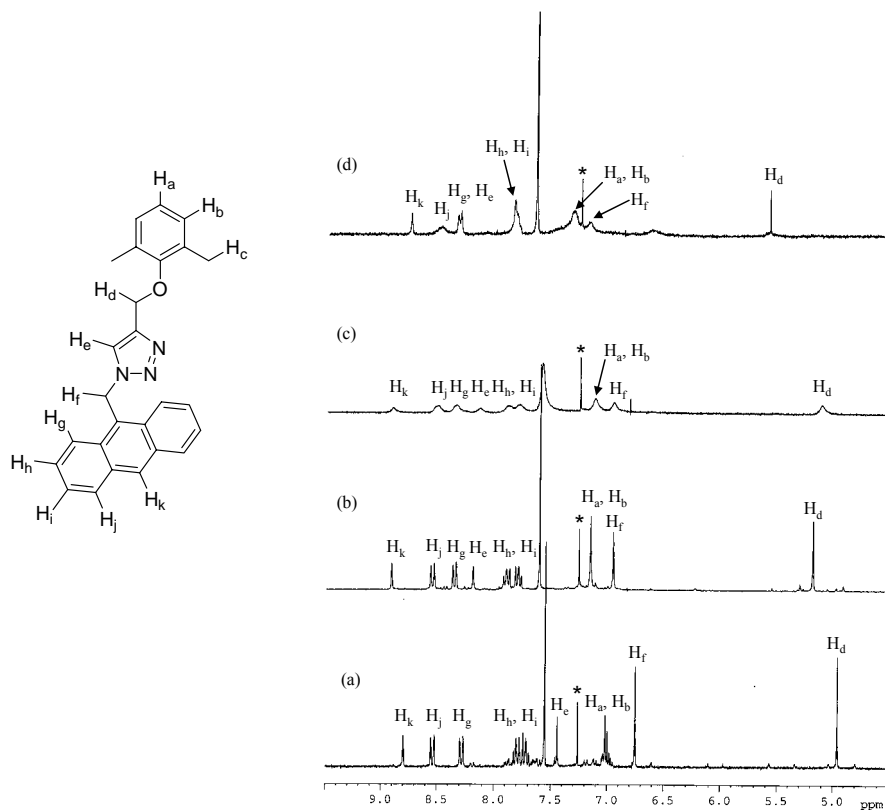

**Figure S11.** Changes in fluorescence emission spectra of **1** (10  $\mu\text{M}$ ) upon titration with  $\text{Cu}(\text{ClO}_4)_2$  in  $\text{MeCN}/\text{CHCl}_3$  ( $v/v = 1000:4$ ). (The excitation wavelength was 367 nm.)

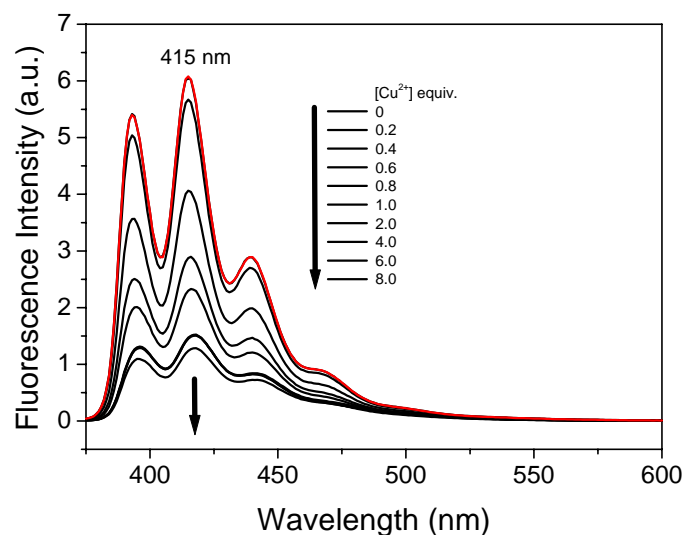

**Figure S12.** Job plot of a 1:1 complex of **1** and  $\text{Cu}^{2+}$ , where the difference in fluorescence intensity at 415 nm was plotted against the mole fraction of **1** at an invariant total concentration of 10  $\mu\text{M}$  in  $\text{MeCN}/\text{CHCl}_3$  ( $v/v = 1000:4$ ).

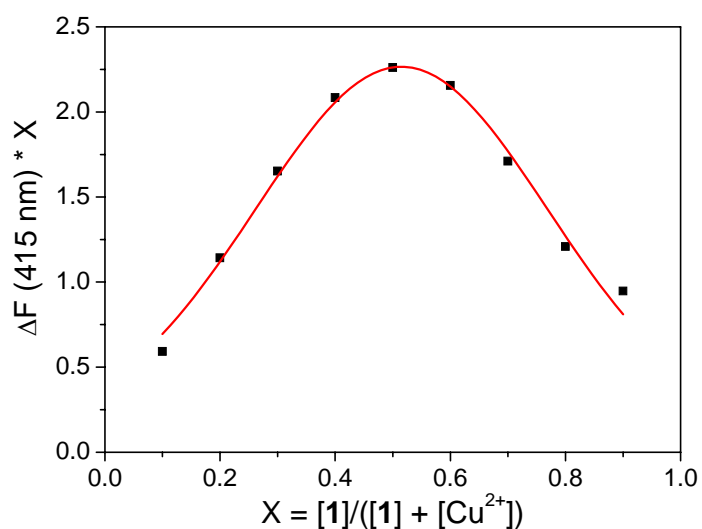

**Figure S13.** Changes in fluorescence emission spectra of **1** (10  $\mu\text{M}$ ) upon titration with  $\text{Hg}(\text{ClO}_4)_2$  in  $\text{MeCN}/\text{CHCl}_3$  ( $v/v = 1000:4$ ). (The excitation wavelength was 367 nm.)

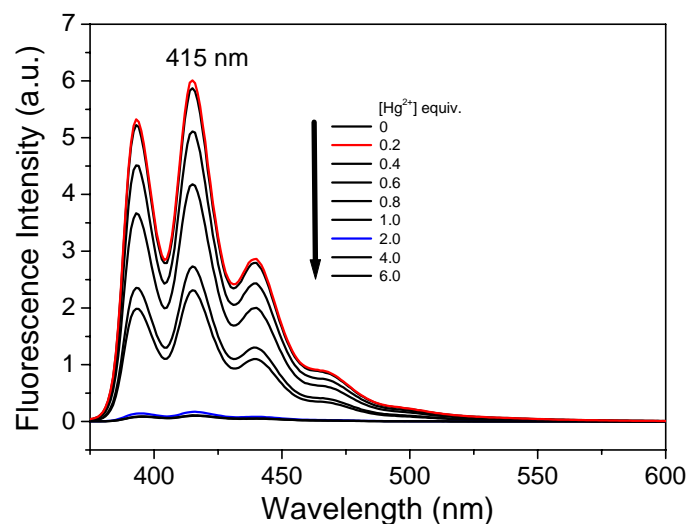

**Figure S14.** Job plot of a 1:1 complex of **1** and  $\text{Hg}^{2+}$ , where the difference in fluorescence intensity at 415 nm was plotted against the mole fraction of **1** at an invariant total concentration of 10  $\mu\text{M}$  in  $\text{MeCN}/\text{CHCl}_3$  ( $v/v = 1000:4$ ).

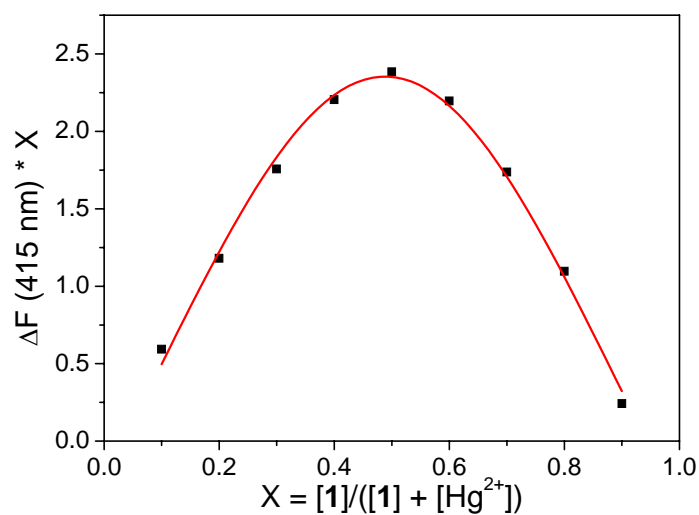

**Figure S15.** Changes in fluorescence emission spectra of **1** (10  $\mu\text{M}$ ) upon titration with  $\text{Cr}(\text{ClO}_4)_3$  in  $\text{MeCN}/\text{CHCl}_3$  ( $v/v = 1000:4$ ). (The excitation wavelength was 367 nm.)

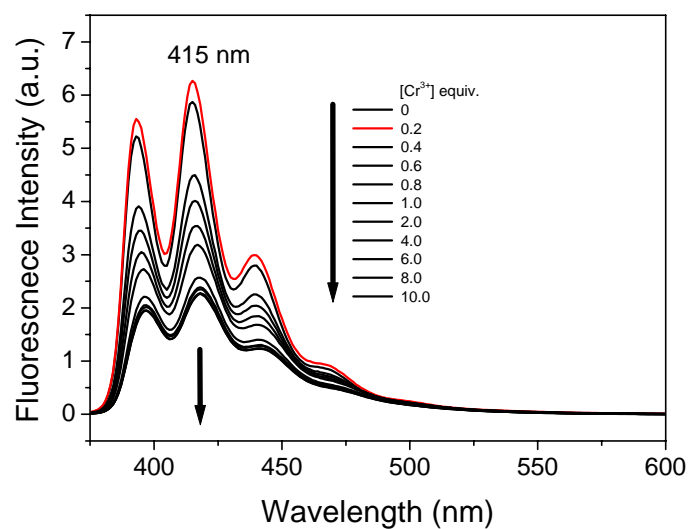

**Figure S16.** Job plot of a 1:1 complex of **1** and  $\text{Cr}^{3+}$ , where the difference in fluorescence intensity at 415 nm was plotted against the mole fraction of **1** at an invariant total concentration of 10  $\mu\text{M}$  in  $\text{MeCN}/\text{CHCl}_3$  ( $v/v = 1000:4$ ).

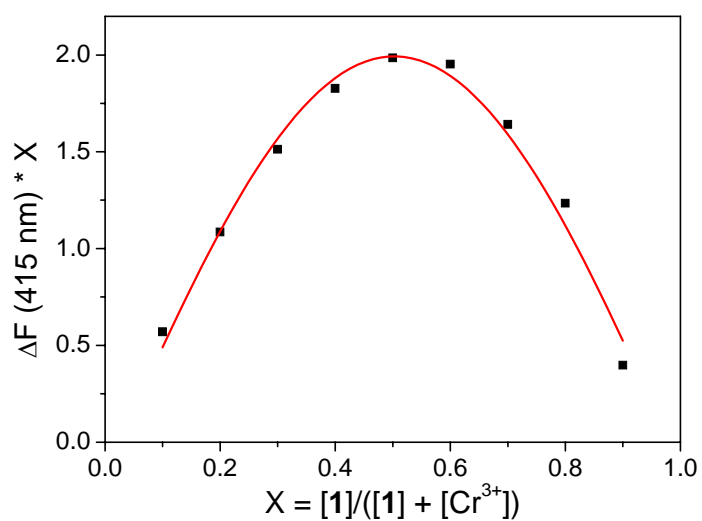

**Figure S17.** Changes in fluorescence emission spectra of **2** (10  $\mu\text{M}$ ) upon titration with  $\text{Cu}(\text{ClO}_4)_2$  in  $\text{MeCN}/\text{CHCl}_3$  ( $v/v = 1000:4$ ). (The excitation wavelength was 350 nm.)

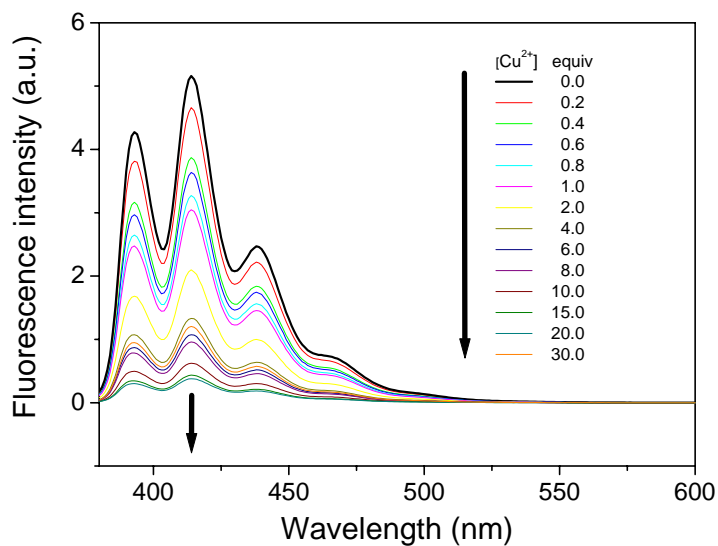

**Figure S18.** Job plot of a 1:1 complex of **2** and  $\text{Cu}^{2+}$ , where the difference in fluorescence intensity at 414 nm was plotted against the mole fraction of **2** at an invariant total concentration of 10  $\mu\text{M}$  in  $\text{MeCN}/\text{CHCl}_3$  ( $v/v = 1000:4$ ).

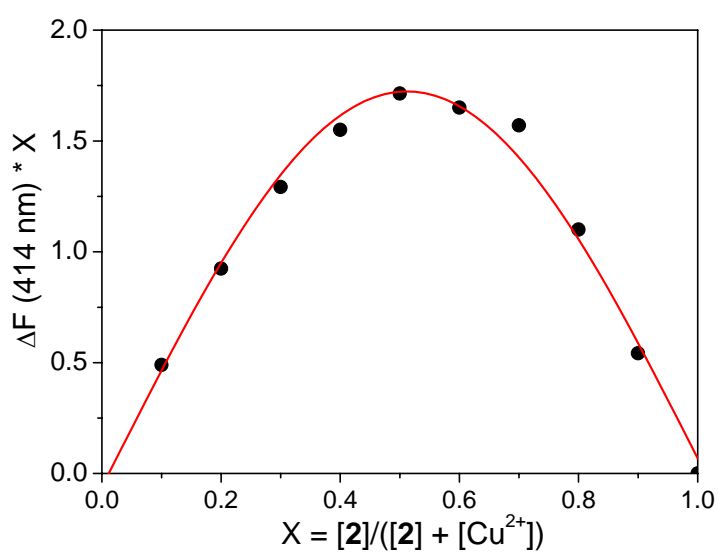

**Figure S19.** Changes in fluorescence emission spectra of **2** (10  $\mu\text{M}$ ) upon titration with  $\text{Hg}(\text{ClO}_4)_2$  in  $\text{MeCN}/\text{CHCl}_3$  ( $v/v = 1000:4$ ). (The excitation wavelength was 350 nm.)

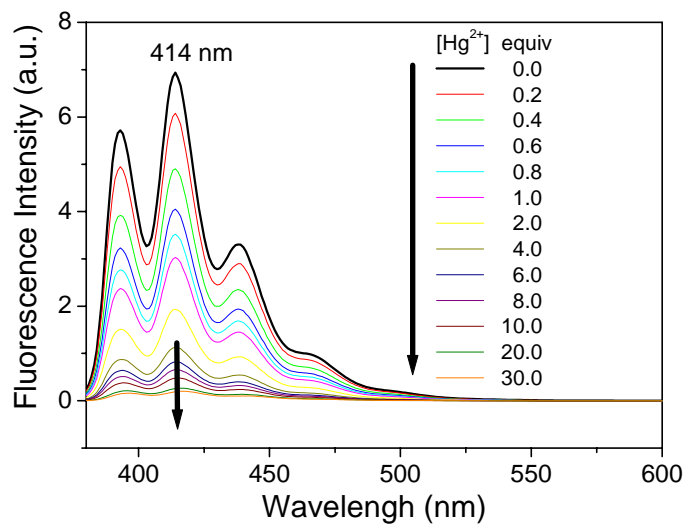

**Figure S20.** Job plot of a 1:1 complex of **2** and  $\text{Hg}^{2+}$ , where the difference in fluorescence intensity at 414 nm was plotted against the mole fraction of **2** at an invariant total concentration of 10  $\mu\text{M}$  in  $\text{MeCN}/\text{CHCl}_3$  ( $v/v = 1000:4$ ).

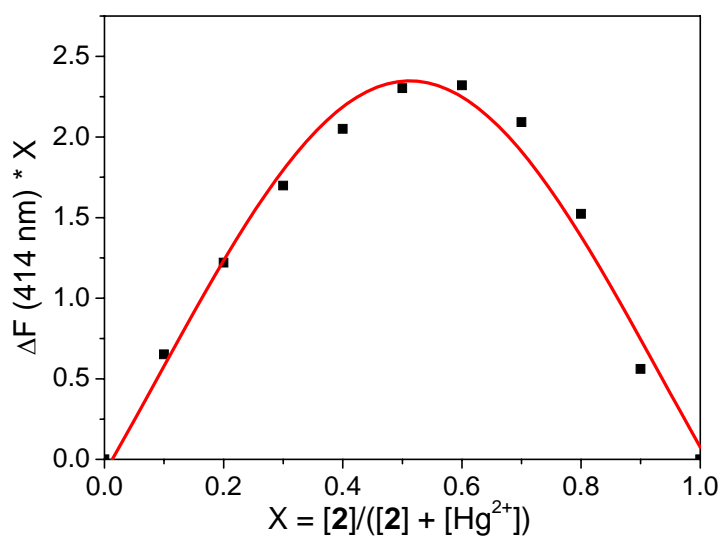



**Figure S21.** Changes in fluorescence emission spectra of **2** (10  $\mu\text{M}$ ) upon titration with  $\text{Cr}(\text{ClO}_4)_3$  in  $\text{MeCN}/\text{CHCl}_3$  ( $v/v = 1000:4$ ). (The excitation wavelength was 350 nm.)

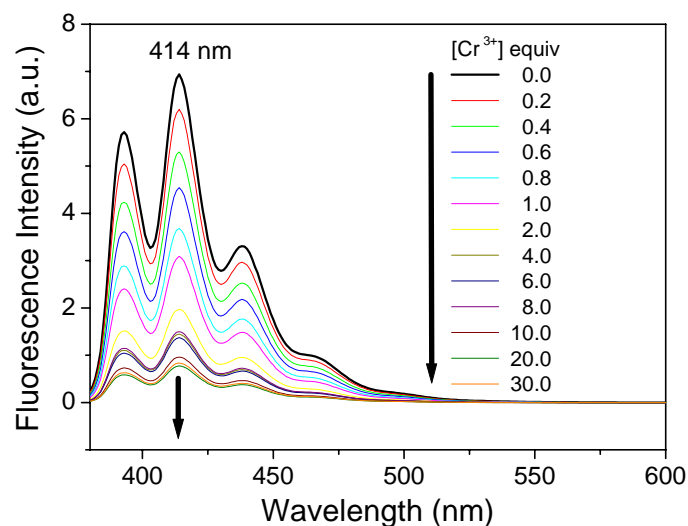

**Figure S22.** Job plot of a 1:1 complex of **2** and  $\text{Cr}^{3+}$ , where the difference in fluorescence intensity at 414 nm was plotted against the mole fraction of **2** at an invariant total concentration of 10  $\mu\text{M}$  in  $\text{MeCN}/\text{CHCl}_3$  ( $v/v = 1000:4$ ).

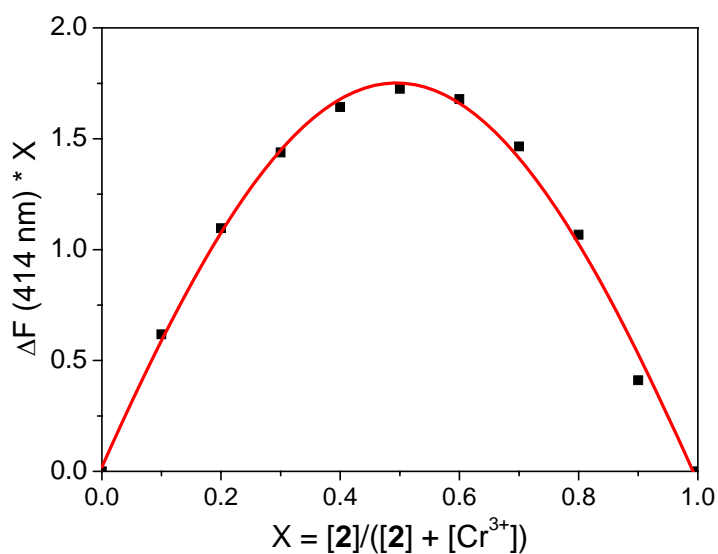

**Figure S23.** Fluorescence emission changes of **1**•Hg<sup>2+</sup>, **1**•Cu<sup>2+</sup> and **1**•Cr<sup>3+</sup> complexes in MeCN/CHCl<sub>3</sub> (v/v = 1000:4) upon addition of K<sup>+</sup>. (The excitation wavelength was 367 nm.)

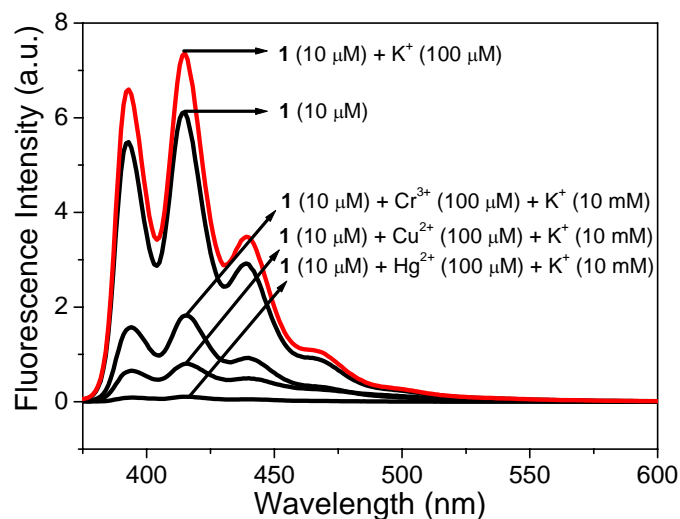

**Figure S24** Fluorescence emission changes of **1**•Pb<sup>2+</sup> complex in MeCN/CHCl<sub>3</sub> (v/v = 1000:4) upon addition of Ba<sup>2+</sup>. (The excitation wavelength was 367 nm.)

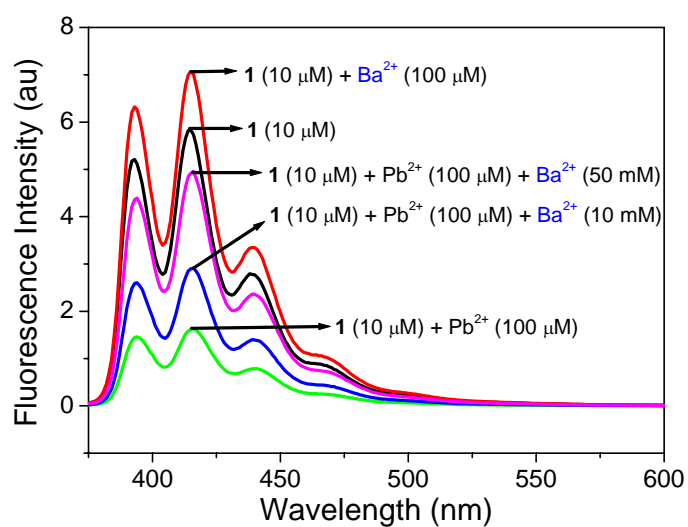

**Figure S25** Fluorescence emission changes of **1**•Pb<sup>2+</sup> complex in MeCN/CHCl<sub>3</sub> (v/v = 1000:4) upon addition of Zn<sup>2+</sup>. (The excitation wavelength was 367 nm.)

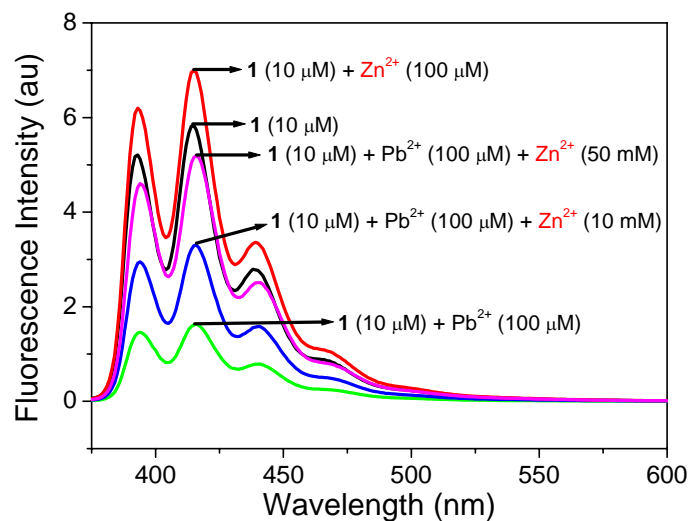

**Figure S26** Fluorescence emission changes for the **1** (10 μM) with 10 equiv of Pb(ClO<sub>4</sub>)<sub>2</sub> in MeCN/CHCl<sub>3</sub> (v/v = 1000:4) upon addition of various amount of K<sup>+</sup> ion ( $\lambda_{\text{excitation}} = 367$  nm).

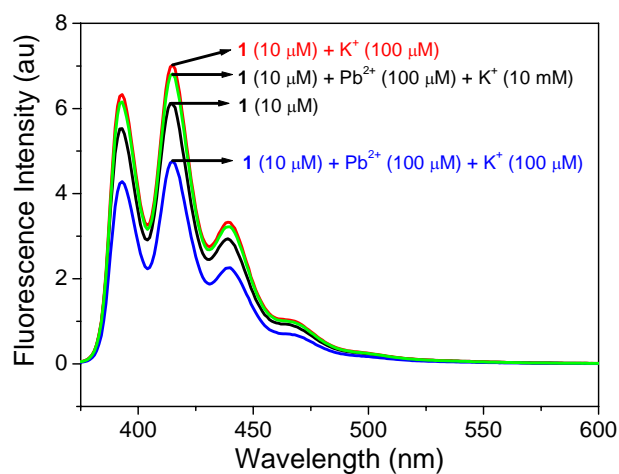

**Figure S27** Fluorescence emission changes for the **1** (10  $\mu\text{M}$ ) with 10 equiv of  $\text{K}(\text{ClO}_4)$  in  $\text{MeCN}/\text{CHCl}_3$  (v/v = 1000:4) upon addition of various amount of  $\text{Pb}^{2+}$  ion ( $\lambda_{\text{excitation}} = 367 \text{ nm}$ ).

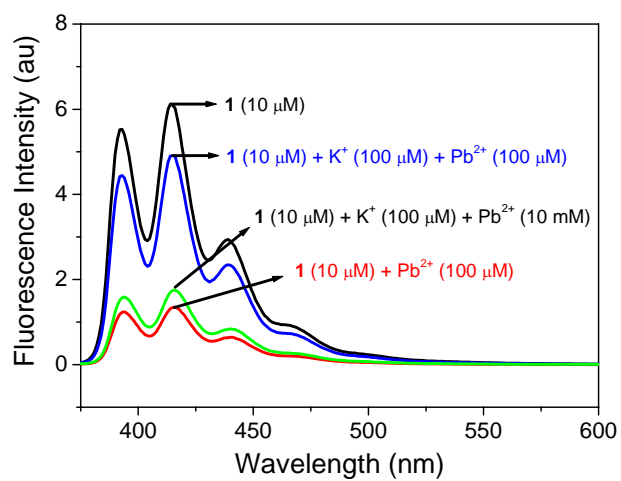

Supplement: Supplementary file 1 [file 22179372]
